# Supplementary material for: Self-assembly, photophysical and electrochemical properties and activation of the TiO2 photocatalyst by perylene bisimide
Source: Royal Society of Chemistry journal article supplement (doi:10.1039/c3nj01356a), 2014-01-01
Supplement: c3nj01356a1.pdf [file c3nj01356a1.pdf]

## Supporting Information

### Self- assembly, photophysical, electrochemical properties and activation of TiO<sub>2</sub> photocatalyst by perylene bisimide

Adhimoolam Senthilraja<sup>a</sup>, Balu Krishnakumar<sup>a</sup>, Meenankshisundaram Swaminathan<sup>a</sup> and Samuthira Nagarajan<sup>b\*</sup>

<sup>a</sup>Department of Chemistry, Annamalai University, Annamalainagar 608 002, Tamil Nadu, India.

<sup>b</sup>Department of Chemistry, Central University of Tamil Nadu, Thiruvarur 601101, Tamil Nadu, India.

Email: [snagarajan@cutn.ac.in](mailto:snagarajan@cutn.ac.in) Tel: +91 94430 46272

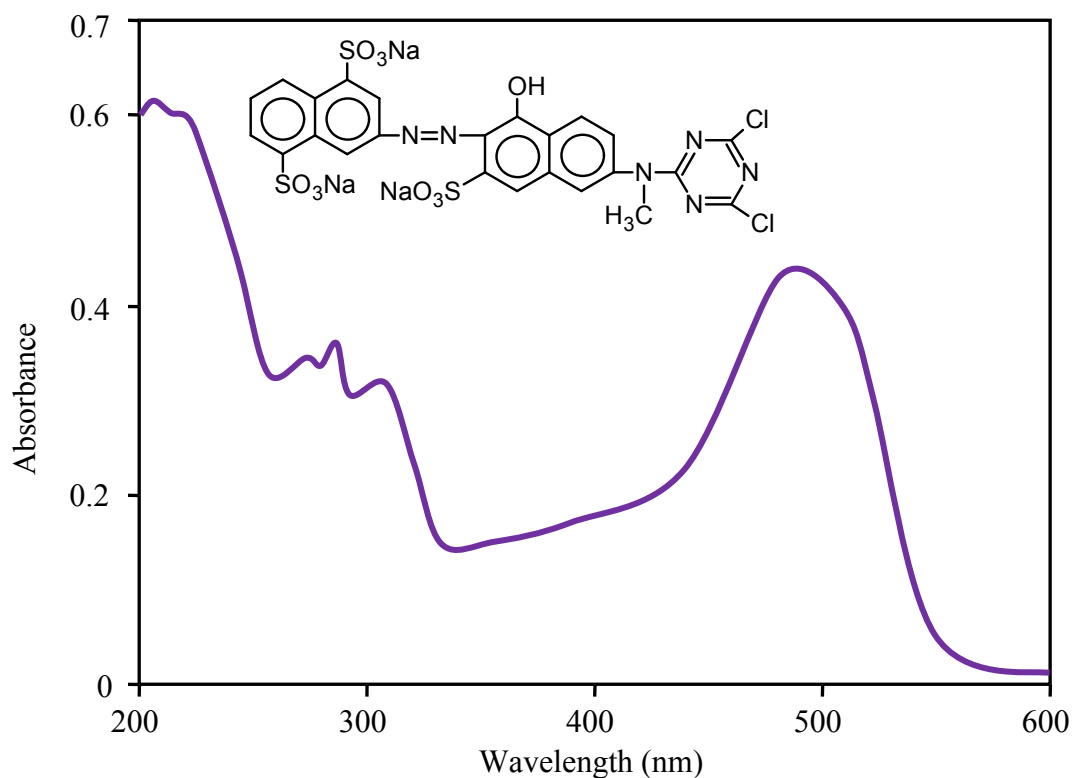

Fig.S1 Dye RO 4 structure and UV spectrum

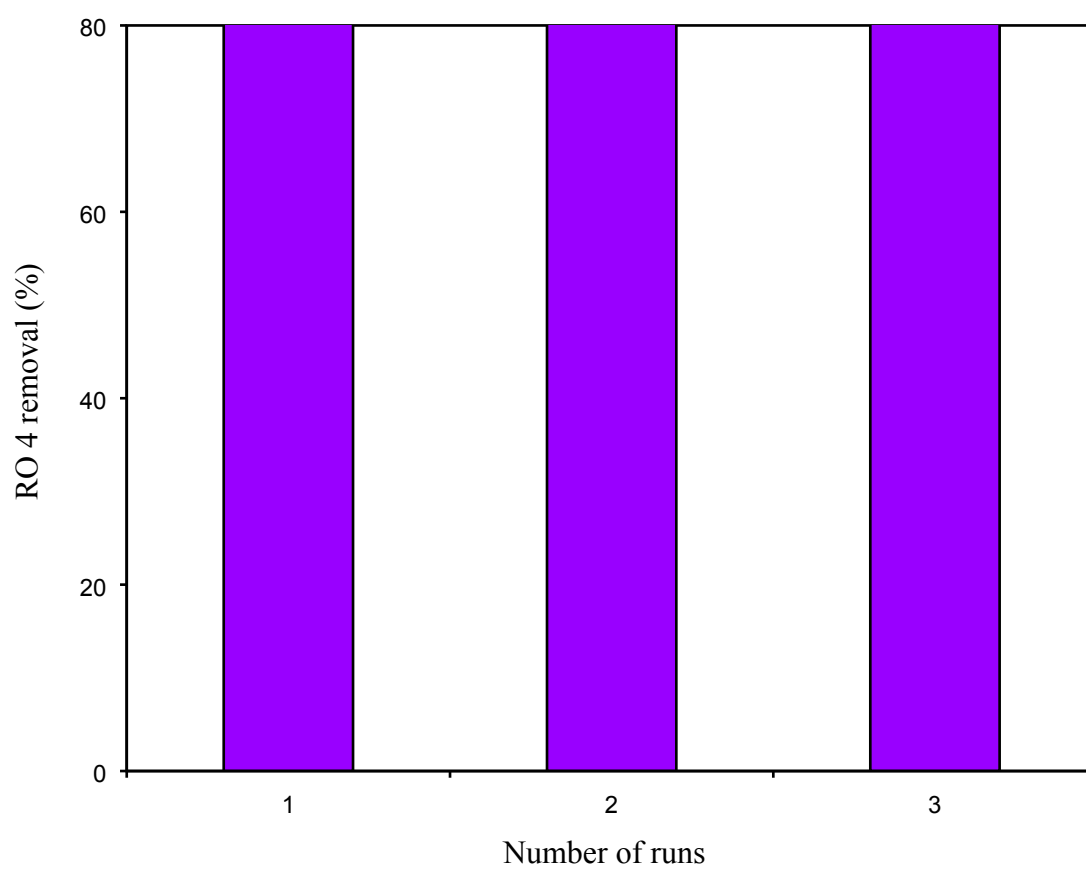

Fig. S2. Catalyst reusability;  $[\text{RO 4}] = 5 \times 10^{-4} \text{M}$ ,  $\text{pH} = 7$ , catalyst suspended =  $2 \text{g L}^{-1}$ , airflow rate =  $8.1 \text{ mLs}^{-1}$ ,  $I_{UV} = 1.381 \times 10^{-6} \text{einstein L}^{-1} \text{ s}^{-1}$ , irradiation time = 60 min

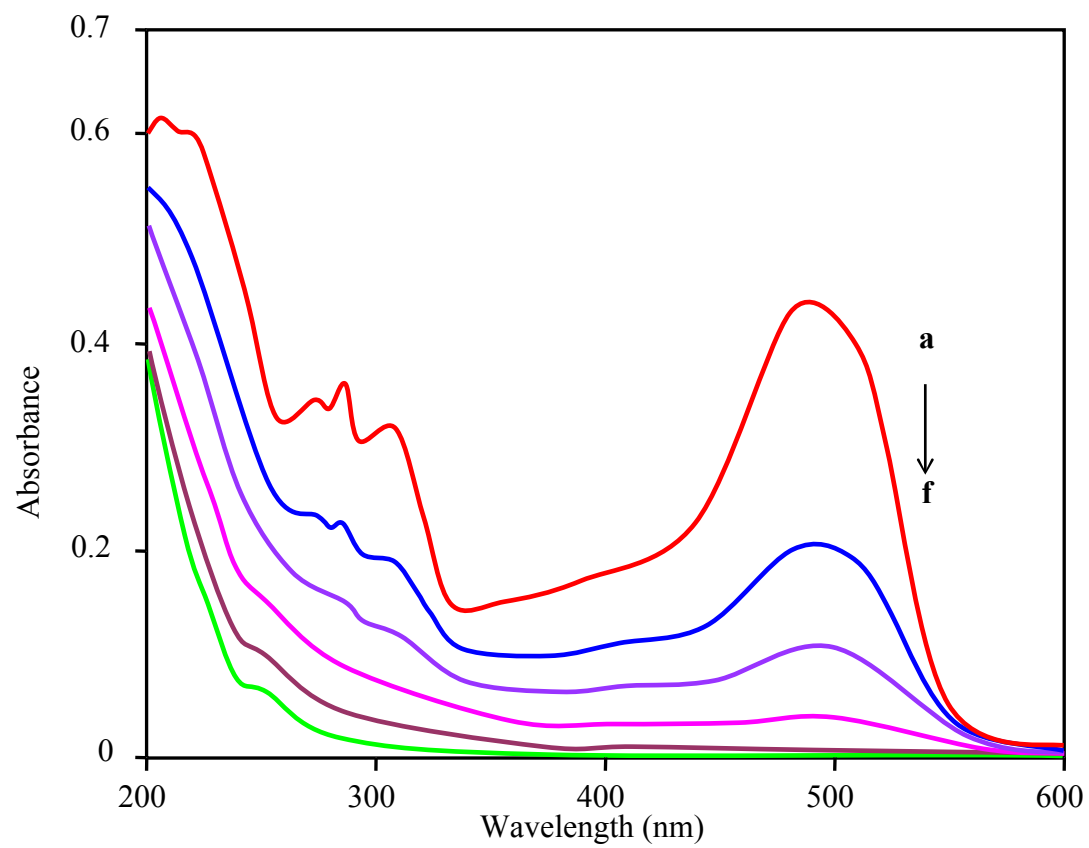

**Fig.S3** The changes in UV-vis spectra of RO 4 on irradiation with UV light in the presence of 0.05 wt% DPBI loaded TiO<sub>2</sub>  
a) 0 min, b) 10 min, c) 20 min, d) 30 min, e) 40 min and f) 60 min  
[RO 4] = 5×10<sup>-4</sup>M, pH=7, catalyst suspended = 2gL<sup>-1</sup>, airflow rate = 8.1 mLs<sup>-1</sup>,  
 $I_{UV} = 1.381 \times 10^{-6}$  einstein L<sup>-1</sup> s<sup>-1</sup>
